# Supplementary material for: Dual purpose Prussian blue nanoparticles for cellular imaging and drug delivery: a new generation of T1-weighted MRI contrast and small molecule delivery agents
Source: Royal Society of Chemistry journal article supplement (doi:10.1039/b923184f), 2010-01-01
Supplement: b923184f.pdf [file b923184f.pdf]

## Electronic Supplementary Information (ESI)

### **Dual Purpose Prussian Blue Nanoparticles for Cellular Imaging and Drug Delivery: A New Generation of $T_1$ -Weighted MRI Contrast and Small Molecule Delivery Agents**

Mohammadreza Shokouhimehr,<sup>a,‡</sup> Eric S. Soehnlen,<sup>a,‡</sup> Jihua Hao,<sup>b,c</sup> Mark Griswold,<sup>b</sup> Chris Flask,<sup>b</sup> Xudong Fan,<sup>d</sup> James P. Babilion,<sup>\*b,c,e</sup> Soumitra Basu,<sup>\*a</sup> and Songping D. Huang<sup>\*a</sup>

<sup>a</sup>*Department of Chemistry, Kent State University, Kent, OH 44240, USA. To whom correspondence should be addressed Fax: +1-330-672-3816; E-mail: shuang1@kent.edu*

<sup>b</sup>*Case Center for Imaging Research, Department of Radiology, Case Western Reserve University, Cleveland, OH 44106, USA*

<sup>c</sup>*NFCR for Molecular Imaging, Case Western Reserve University, Cleveland, OH 44106, USA*

<sup>d</sup>*Center for Advanced Microscopy, Michigan State University, East Lansing, MI 48824, USA*

<sup>e</sup>*Department of Biomedical Engineering, Case Western Reserve University, Cleveland, OH 44106, USA*

<sup>‡</sup>*Authors contributed equally*

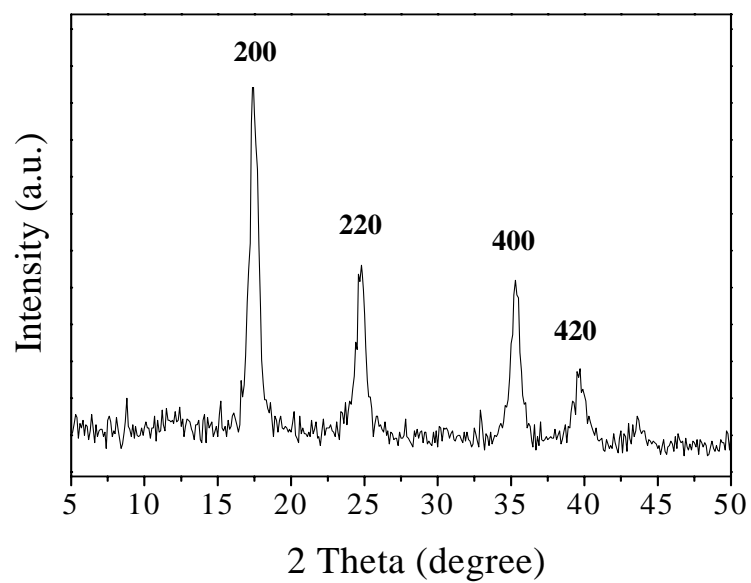

**Fig. S1** XRD pattern of the PBNPs.

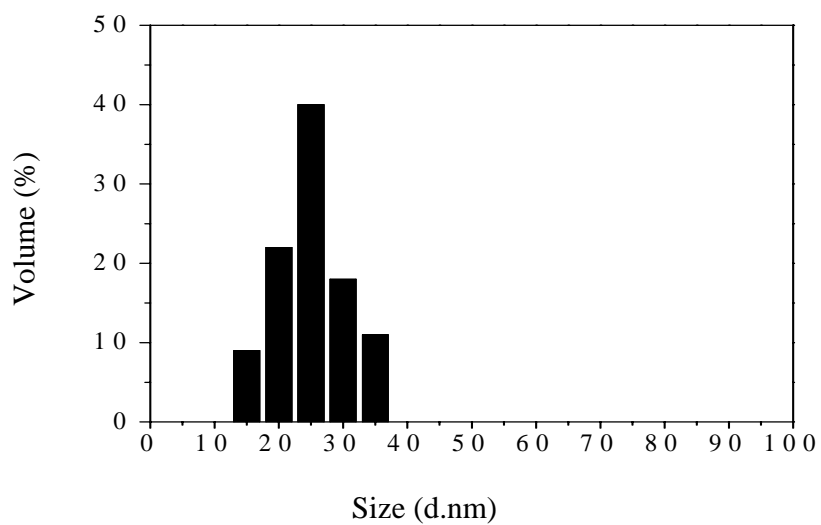

**Fig. S2** Size distributions of PBNPs as determined by the dynamic light scattering (DLS) method

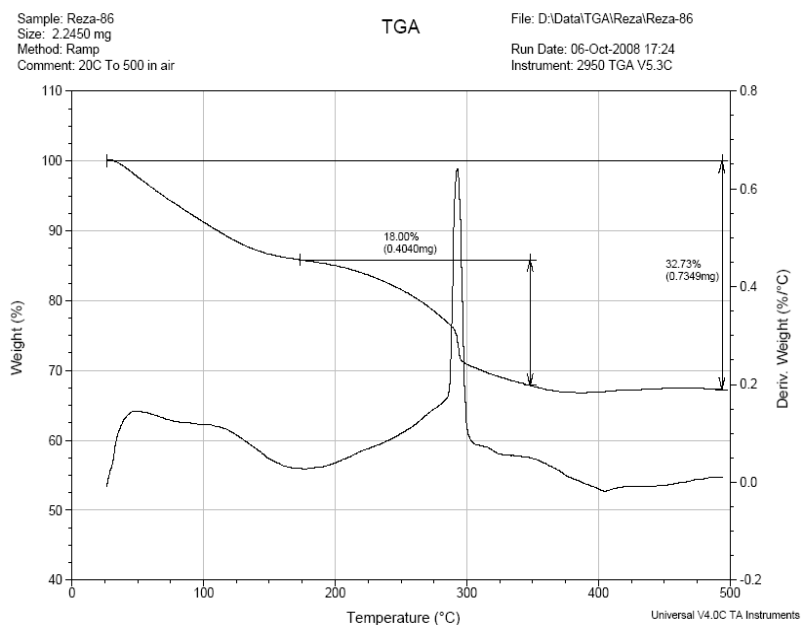

**Fig. S3a** The TGA curve of uncoated PBNPs.

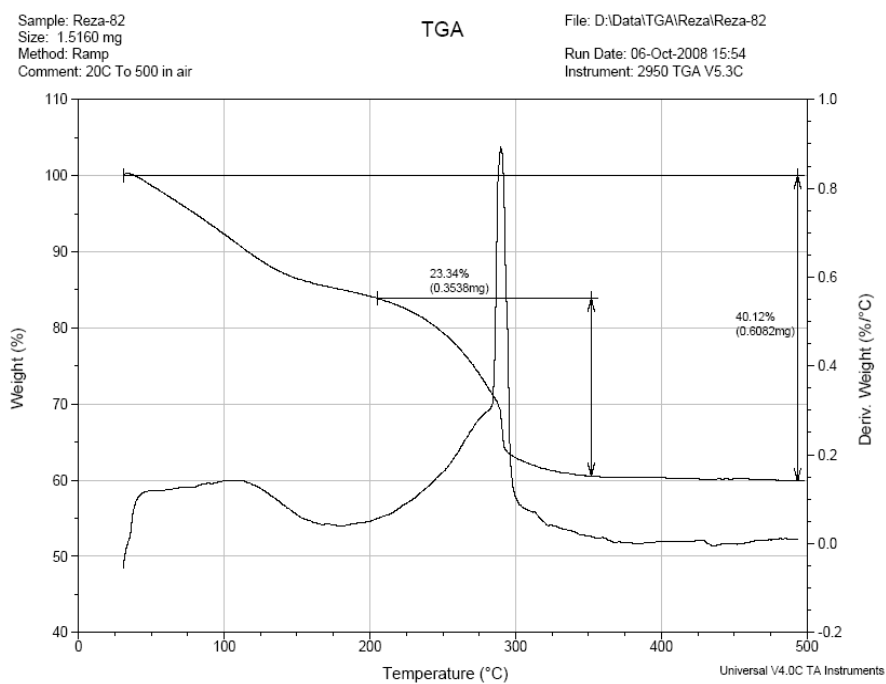

**Fig. S3b** The TGA curve of citrate coated PB nanoparticles.

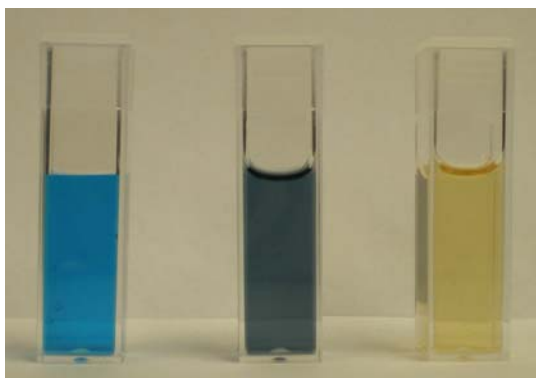

**Fig. S4a** Digital camera images of the PBNPs incubated in water at 37 °C for 24 h (left), incubated in serum at 37 °C for 24 h (middle), and untreated serum (right).

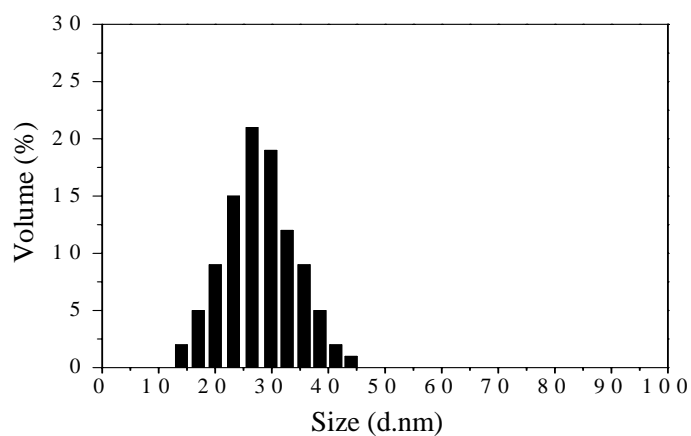

**Fig. S4b** DLS diagram of the PBNPs incubated in serum at 37 °C for one week.

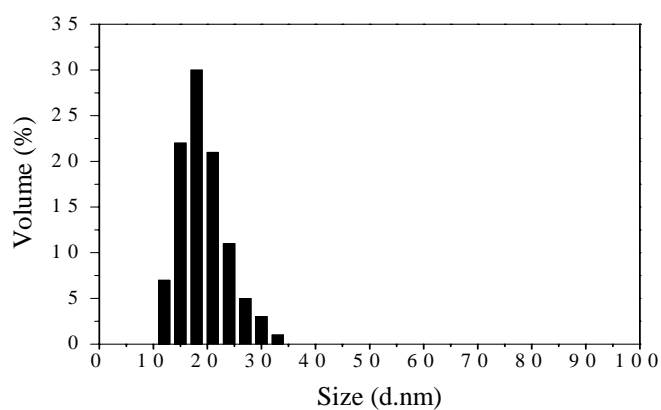

**Fig. S4c** DLS diagram of the PBNPs incubated in serum at 37 °C for one month.

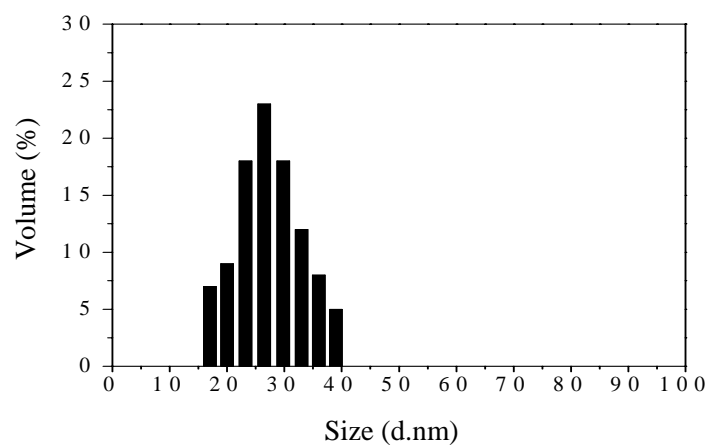

**Fig. S4d** DLS diagram of PBNPs incubated in water at 37 °C for one week as the control.

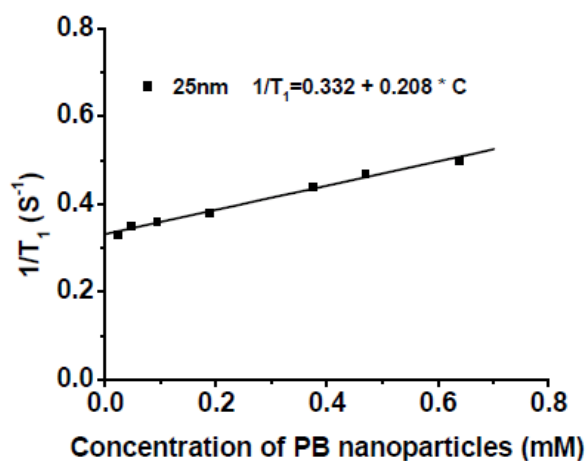

**Fig. S5** The proton T<sub>1</sub> relaxation rate versus concentration of PBNPs at 7 T.

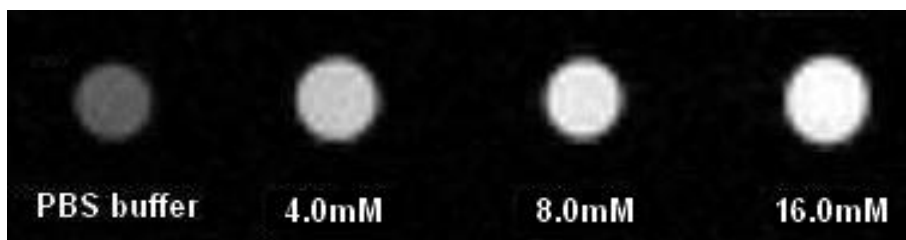

**Fig. S6** T<sub>1</sub>-weighted MRI phantoms of PB nanoparticles (25 nm) acquired from a 7 T MRI system.

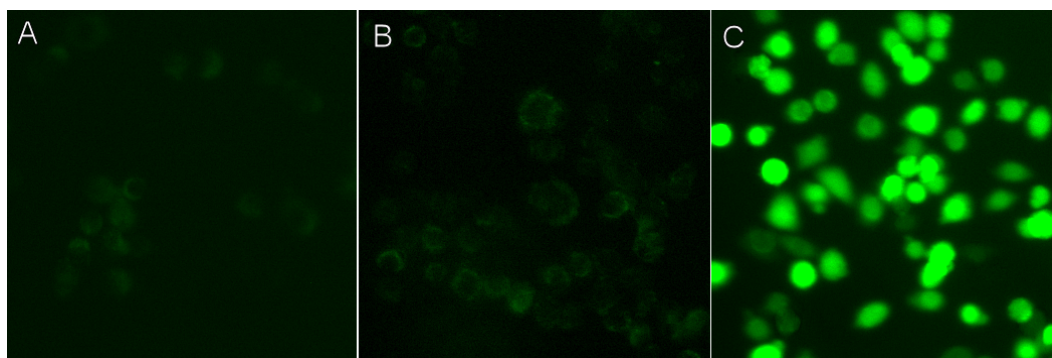

**Fig. S7** Intracellular ROS *via* fenton chemistry.

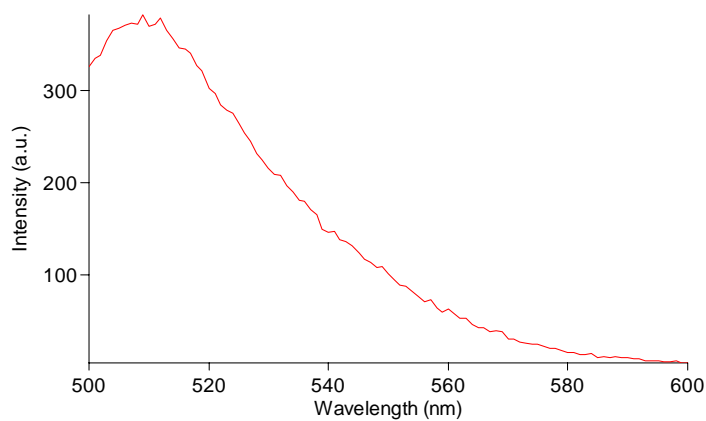

**Fig. S8** The emission spectrum of *TRPBNPs* measured by fluorescence spectroscopy (the excitation wavelength is 490 nm).

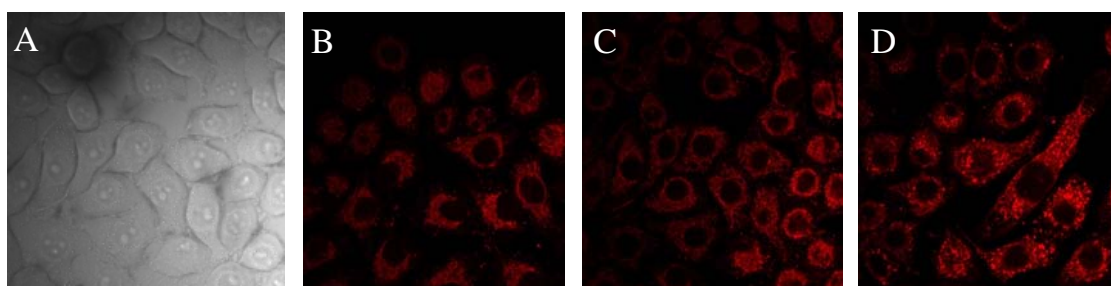

**Fig. S9** Confocal microscopy images of HeLa cells (a) and HeLa cells incubated with TRPBNPs for 2hrs (B) 4hrs (C) and 24hrs (D).
